# Supplementary material for: Synthesis of meso-substituted porphyrins carrying carboranes and oligo(ethylene glycol) units for potential applications in boron neutron capture therapyElectronic supplementary information (ESI) available: experimental details for the synthesis of compounds 12–15, 31 and 32. See http://www.rsc.org/suppdata/ob/b2/b209534c/
Source: Royal Society of Chemistry journal article supplement (doi:10.1039/b209534c), 2002-12-19
Supplement: b209534c.doc [file b209534c.doc]

Supplementary Material for Organic & Biomolecular Chemistry

This journal is © The Royal Society of Chemistry 2003

# Supplementary data

# Synthesis of *meso*-substituted porphyrins carrying carboranes and oligo(ethylene glycol) units for potential applications in boron neutron capture therapy

Christophe Frixa, Mary F. Mahon, Andrew S. Thompson and Michael D. Threadgill

# Experimental

**4-(Prop-2-ynyloxy)benzaldehyde 12**

4-Hydroxybenzaldehyde **11** (6.10 g, 50 mmol) was stirred with sodium ethoxide (from sodium (1.15 g, 50 mmol)) in dry ethanol (100 cm3) for 15 min before addition of 3-bromo­propyne (8.20 g, 80% in toluene, 55 mmol). The mixture was boiled under reflux for 30 min. The evaporation residue, in dichloromethane, was washed (water). Drying and chromatography (hexane / dichloromethane 1:3) gave **12** (5.64 g, 70%) as a white powder: mp 77-79°C (lit.19 mp 79-80°C);  2.58 (1 H, t, *J* 2.4 Hz, CCH), 4.80 (2 H, d, *J* 2.4 Hz, CH2), 7.10 (2 H, d, *J* 8.8 Hz, 3,5-H2), 7.91 (2 H, d, *J* 8.8 Hz, 2,6-H2), 9.91 (1 H, s, CHO).

**2-(4-(Prop-2-ynyloxy)phenyl)-4,5-dihydro-1,3-dithiole 13**

Boron trifluoride diethyl etherate (3.9 cm3, 32 mmol) was added to **12** (5.0 g, 31 mmol) and ethane-1,2-dithiol (6.0 g, 64 mmol) in dichloromethane (160 cm3) at 0°C. The mixture was stirred at 20C for 20 h, washed (water) and dried. Evaporation and chromatography (dichloromethane / pentane 1:4) gave **13** (6.1 g, 83%) as a pale yellow oil (lit.19 oil):  2.52 (1 H, t, *J* 2.4 Hz, CCH), 3.33 (2 H, m) and 3.48 (2 H, m) (dithiole 4,5-H4), 4.67 (2 H, d, *J* 2.4 Hz, CH2CC), 5.63 (1 H, s, dithiole 2-H), 6.91 (2 H, d, *J* 8.8 Hz, Ph 3,5-H2), 7.46 (2 H, d, *J* 8.8 Hz, Ph 2,6-H2).

**1-[4-(4,5-Dihydro-1,3-dithiol-2-yl)phenoxymethyl]-1,2-dicarba*closo­*dodeca­borane(12) 14**

Decaborane(14) (B10H14) (2.0 g, 16 mmol) in dry acetonitrile (160 cm3) was stirred under argon for 3 h before **13** (3.6 g, 15 mmol) was added. The mixture was boiled under reflux for 3 d. Evaporation and chromatography (dichloromethane / pentane 1:4) gave **14** (2.74 g, 47%) as white crystals: mp 120-121°C (lit.19 mp 123-125°C);  2.1 (10 H, br q, *J*B-H 150 Hz, B10H10), 3.36 (2 H, m) and 3.49 (2 H, m) (dithiole 4,5-H4), 4.08 (1 H, br s, carborane 2-H), 4.39 (2 H, s, carborane-CH2), 5.61 (1 H, s, dithiole 2-H), 6.78 (2 H, d, *J* 8.8 Hz, Ph 3,5-H2), 7.47 (2 H, d, *J* 8.8 Hz, Ph 2,6-H2); *m/z* 11B / 10B isotope cluster centred at 354 (M + H).

**4-(1,2-Dicarba*closo*dodecaboran(12)-1-ylmethoxy)benzaldehyde 15**

Dithiole **14** (900 mg, 2.5 mmol) was stirred with mercury(II) perchlorate hydrate (2.2 g, 5.5 mmol) in tetrahydrofuran (21 cm3) for 5 min. The suspension was filtered. The evaporation residue, in dichloromethane, was washed with aq. Na2CO3 (10%) and dried. Chromatography (chloroform) gave **15** (535 mg, 76%) as a white powder: mp 154-156°C (lit.19 mp 148-151°C);  2.1 (10 H, br q, *J*B-H 150 Hz, B10H10), 4.07 (1 H, br s, carborane 2-H), 4.51 (2 H, s, CH2-carborane), 6.98 (2 H, d, *J* 8.8 Hz, Ph 2,6-H2), 7.87 (2 H, d, *J* 8.8 Hz, Ph 3,5-H2), 9.92 (1 H, s, CHO).

# 3-(Trimethylsilylethynyl)benzaldehyde 31

# Dry triethylamine (60 cm3) was bubbled with argon for 30 min. Palladium(II) acetate (180 mg, 800 mol), triphenylphosphine (360 mg, 1.4 mmol), 3‑bromo­benzaldehyde 30 (12.8 g, 69 mmol) and ethynyl­trimethylsilane (7.47 g, 76 mmol) were added and the mixture was boiled under reflux for 16 h. The evaporation residue, in chloroform, was washed with water and brine. Evaporation and distillation (Kugelrohr) gave 31 (10.0 g, 72%) as a colourless oil: bp1.3 144-146C (lit.30 bp0.2 120-122C); H 0.26 (9 H, s, SiMe3), 7.47 (1 H, t, *J* 7.4 Hz, Ph 5‑H), 7.70 (1 H, ddd, *J* 7.4, 1.6, 1.2 Hz, Ph 4-H), 7.82 (1 H, ddd, *J* 7.4, 1.6, 1.2 Hz, Ph 6-H), 7.96 (1 H, dd, *J* 1.6, 1.2 Hz, Ph 2-H); C 0.0, 96.1, 103.2, 124.2, 128.8, 128.9, 133.3, 136.2, 137.2, 191.2; *m/z* (EI+) 187 (M).

## 3-Ethynylbenzaldehyde 32

## Compound 31 (9.0 g, 44 mmol) was stirred with anhydrous potassium carbonate (566 mg, 4.1 mmol) in dry methanol (110 cm3) for 5 h. Filtration, evaporation and chromatography (hexane / chloroform 2:1  1:1) gave 32 (7.30 g, 58%) as white crystals: mp 75-76C (lit.30 mp 76-76.5C); H 3.17 (1 H, s, CCH), 7.50 (1 H, t, *J* 7.8 Hz, Ph 5-H), 7.73 (1 H, ddd, *J* 7.8, 1.7, 1.3 Hz, Ph 4‑H), 7.86 (1 H, ddd, *J* 7.8, 1.7, 1.3 Hz, Ph 6-H), 7.97 (1 H, dd, *J* 1.7, 1.3 Hz, Ph 2-H); C 78.8, 82.0, 123.3, 129.1, 129.5, 133.4, 136.4, 137.6, 191.4.

# Reference

1. W. B. Austin, N. Bilow, W. J. Kelleghan and K. S. Y. Lau, *J. Org. Chem*. 1981, **46**, 2280.
